# Supplementary material for: Assessment and application of GeneXpert rapid testing for respiratory viruses in school wastewater
Source: Royal Society of Chemistry journal article supplement (doi:10.1039/d4ew00526k), 2024-11-20
Supplement: d4ew00526k1.pdf [file d4ew00526k1.pdf]

1

2

## Supplementary Materials

3 **Assessment and application of GeneXpert rapid testing for respiratory viruses**

4

### **in school wastewater**

5

6 Jingjing Wu <sup>a</sup>, Katherine B. Ensor <sup>b</sup>, Loren Hopkins <sup>b, c</sup>, and Lauren B. Stadler <sup>a\*</sup>

7

8 Author affiliations:

9 <sup>a</sup> Department of Civil and Environmental Engineering, Rice University, 6100 Main Street

10 MS 519, Houston, TX 77005, USA

11 <sup>b</sup> Department of Statistics, Rice University, Houston, 77005, USA

12 <sup>c</sup> Houston Health Department, 8000 N. Stadium Dr., Houston, TX 77054

13

14 \*Corresponding author. Email address: [lauren.stadler@rice.edu](mailto:lauren.stadler@rice.edu)

15

16

17 **S1. School enrollment information**

18 **Table S1.** Schools sampled (n = 169) with school code, type, and enrollment information.

| School | Type              | Enrollment |
|--------|-------------------|------------|
| A      | Elementary school | 405        |
| B      | Middle school     | 509        |
| C      | Middle school     | 1,034      |
| D      | High school       | 2,434      |

19

20 **S2. RT-ddPCR assays setup and thermal cycling conditions**

21 **Table S2.** Primers and probes used for quantification of SARS-CoV-2 with RT-ddPCR

| Target  | Assay Name      | Sequence (5'-3')                                                                                                                                                                                                                                                      | Reference         |
|---------|-----------------|-----------------------------------------------------------------------------------------------------------------------------------------------------------------------------------------------------------------------------------------------------------------------|-------------------|
| N1 gene | Forward Primer  | GACCCCAAATCAGCGAAAT                                                                                                                                                                                                                                                   | (Lu et al., 2022) |
|         | Reverse Primer  | TCTGGTTACTGCCAGTTGAATCTG                                                                                                                                                                                                                                              |                   |
|         | Probe           | Cy5/ACCCCGCAT/TAO/TACGTTTGGTGGACC/3IAbRQSp                                                                                                                                                                                                                            |                   |
|         | Amplicon length | 72                                                                                                                                                                                                                                                                    |                   |
|         | Gblock sequence | ATGTCTGATAATGGACCCCAAATCAGCGAAATGCACCCCGCATTACGTTGGTGGACCCTCAGATTCAACTGGCAGTAACCAGAATGGAGAACGCAGTGGGGCGCGATCAAACAACGTCGGCCCAAGGTTTACCCAATAATACTGCGTCTTGGTTCACCGCTCTCACTCAACATGGCAAGGAAGACCTTAAATTCCC TCGAGGACAAGGCGTTCCAATTAACACCAATAGCAGTCCAGATGACCAAA               |                   |
| N2 gene | Forward Primer  | TTACAAACATTGGCCGCAA                                                                                                                                                                                                                                                   | (Lu et al., 2022) |
|         | Reverse Primer  | GCGCGACATTCCGAAGAA                                                                                                                                                                                                                                                    |                   |
|         | Probe           | Cy55/ACAATTTGCCCCAGCGCTTCA G/3IAbRQSp                                                                                                                                                                                                                                 |                   |
|         | Amplicon length | 67                                                                                                                                                                                                                                                                    |                   |
|         | Gblock sequence | CATACAATGTAACACAAGCTTTCGGCAGACGTGGTCCAGAACAAACCCAA GGAAATTTTGGGGACCAGGA ACTAA TCAGACAAGGAACTGATTACAAACA TTGGCCGCAAATTGCACAATTTGCC CCCAGCGCTTCAGCGTTCTTCGGAA TGTCGCGCATTGGCATGGAAGTCAC ACCTTCGGGAACGTGGTTGACCTAC ACAGGTGCCATCAAATTGGATGACA AAGATCCAAATTTCAAAGATCAAGT C |                   |

22 **Table S3.** Primers and probes used for quantification of influenza A and influenza B with RT-  
 23 ddPCR

| Target                              | Assay Name      | Sequence (5'-3')                                                                                                                                                                                                                                                                                                                                                                         | Reference                       |
|-------------------------------------|-----------------|------------------------------------------------------------------------------------------------------------------------------------------------------------------------------------------------------------------------------------------------------------------------------------------------------------------------------------------------------------------------------------------|---------------------------------|
| M1 protein<br>(Influenza A)         | Forward Primer  | CTTCTAACCGAGGTCGAAACGTA                                                                                                                                                                                                                                                                                                                                                                  | (Whiley<br>and Sloots,<br>2005) |
|                                     | Reverse Primer  | GGTGACAGGATTGGTCTTGTCTTTA                                                                                                                                                                                                                                                                                                                                                                |                                 |
|                                     | Probe           | SUN/TCAGGCCCC/ZEN/CTCAAAGCCG<br>AG/3IABkFQ                                                                                                                                                                                                                                                                                                                                               |                                 |
|                                     | Amplicon length | 155                                                                                                                                                                                                                                                                                                                                                                                      |                                 |
|                                     | Gblock sequence | AGGGTCTCGCGACATGAGTCTTCTAA<br>CCGAGGTCGAAACGTACGTTCTCTCT<br>ATCGTCCCGTCAGGCCCCCTCAAAGC<br>CGAGATCGCGCAGAGACTTGAAGATG<br>TGTTTGCAGGGAAGAACACCGATCTT<br>GAGGCACTCATGGAATGGCTAAAGAC<br>AAGACCAATCCTGTCACCTCTGACTA<br>AGGGGATTTTAGGATTTGTGTTACCGC<br>TCACCGTGCCAGTGAGCGAGGACTG<br>CAGCGTAGACGCTTTGTCCAAAATGC<br>CCTTAATGGGAATGGGGATCCAAACA<br>ACATGGACAGAGCGGTCAAACGTAC<br>ATGGCAGAGACCTA    |                                 |
| HA<br>glycoprotein<br>(Influenza B) | Forward Primer  | AAATACGGTGGATTAAACAAAAGCAA                                                                                                                                                                                                                                                                                                                                                               | (van Elden<br>et al.,<br>2001)  |
|                                     | Reverse Primer  | CCAGCAATAGCTCCGAAGAAA                                                                                                                                                                                                                                                                                                                                                                    |                                 |
|                                     | Probe           | ROXN/CACCCATATTGGGCAATTTCTT<br>ATGGC/3IAbRQSp                                                                                                                                                                                                                                                                                                                                            |                                 |
|                                     | Amplicon length | 170                                                                                                                                                                                                                                                                                                                                                                                      |                                 |
|                                     | Gblock sequence | AGGGTCTCGCGACGTAATAAAAAGGGT<br>CCTTGCCTTTAATTGGTGAAGCAGATT<br>GCCTCCATGAAAAATACGGTGGATTA<br>AACAAAAGCAAGCCTTACTACACAGG<br>AGAACATGCAAAAAGCCATAGGAAATT<br>GCCCAATATGGGTGAAAACACCCTTG<br>AAGCTGGCCAATGGAACCAAATATAG<br>ACCGCCTGCAAACTATTAAAGGAAA<br>GGGGTTTCTTTGGAGCTATTGCTGGTT<br>TCTTGAAGGAGGATGGGAAGGAATG<br>ATTGCAGGTTGGCACGGATACACATC<br>TCATGGAGCACATGGAGTGGCAGTGG<br>CTGGCAGAGACCTA |                                 |

24

25

26 **Table S4.** Primers and probes used for quantification of respiratory syncytial virus (RSV) with  
 27 RT-ddPCR

| Target | Assay Name      | Sequence (5'-3')                                                                                                                                                                                                                                                                                                                                              | Reference             |
|--------|-----------------|---------------------------------------------------------------------------------------------------------------------------------------------------------------------------------------------------------------------------------------------------------------------------------------------------------------------------------------------------------------|-----------------------|
| N gene | Forward Primer  | CTCCAGAATAYAGGCATGAYTCTCC                                                                                                                                                                                                                                                                                                                                     | (Hughes et al., 2022) |
|        | Reverse Primer  | GCYCTYCTAATYACWGCTGTAAGAC                                                                                                                                                                                                                                                                                                                                     |                       |
|        | Probe           | FAM/TAACCAAAT/ZEN/TAGCAGCAGG<br>AGATAGATCAG/3IABkFQ                                                                                                                                                                                                                                                                                                           |                       |
|        | Amplicon length | 121                                                                                                                                                                                                                                                                                                                                                           |                       |
|        | Gblock sequence | CTAGAAAATCCTACAAAAAATGCTA<br>AAAGAAATGGGAGAGGTAGCTCCAG<br>AATACAGGCATGACTCTCCTGATTGT<br>GGGATGATAATATTATGTATAGCGGC<br>ATTAGTAATAACCAAATTAGCAGCAG<br>GAGATAGATCAGGTCTTACAGCTGTG<br>ATTAGGAGGGCTAATAATGTCCTAAA<br>AAATGAAATGAAACGTTATAAAGGCT<br>TACTACCCAAGGATATAGCCAACAGC<br>TTCTATGAAGTGTTTGAAAAATATCCT<br>CACTTTATAGATGTTTTTGTTCATTTT<br>GGTATAGCACAATCTTCTA |                       |

28

29 **Table S5.** Final concentrations of primer-probe mix for each target

| Assay Name     | Final concentration ( $\mu\text{M}$ ) | 40x concentration ( $\mu\text{M}$ ) |
|----------------|---------------------------------------|-------------------------------------|
| Forward Primer | 0.9                                   | 36                                  |
| Reverse Primer | 0.9                                   | 36                                  |
| Probe          | 0.25                                  | 10                                  |

30

31 **Table S6.** Reaction composition for RT-ddPCR assay

| Reagent                         | Volume ( $\mu\text{L}$ ) |
|---------------------------------|--------------------------|
| One-step RT-ddPCR supermix      | 5.5                      |
| Reverse Transcript (10x)        | 2.2                      |
| 300 mM DTT                      | 1.1                      |
| Primer-Probe mix of each target | 0.55*                    |
| RNase/DNase-free water          | 0.45                     |
| RNA template                    | 10                       |

32 \*Final concentrations in reaction: 0.25 $\mu\text{M}$  (probe) and 0.9 $\mu\text{M}$  (forward and reverse primers)

33

34 **Table S7.** Thermal cycling conditions for respiratory virus ddPCR assay

| Cycling Step          | Temperature °C | Time     | Number of Cycles |
|-----------------------|----------------|----------|------------------|
| Reverse transcription | 50             | 60 min   |                  |
| Enzyme activation     | 95             | 10 min   |                  |
| Denaturation          | 94             | 30 sec   | 40               |
| Annealing/Extension   | 60             | 60 sec   |                  |
| Enzyme Deactivation   | 98             | 10 min   |                  |
| Hold (optional)       | 4              | Infinite |                  |

35

36 **S3. Quality Control Measures and Limit of Detection (LOD) Calculation**

37 The quality control measures and the calculation of LOD are described by Lou et al.  
 38 (2022) and are summarized briefly as follows. Duplicates of negative control samples were  
 39 included in the concentration, extraction, and quantification steps to assess potential  
 40 contamination (Borchardt et al., 2021). Specifically, two 50 mL aliquots of deionized (DI) water  
 41 were processed in the same way as wastewater samples and used as negative controls for  
 42 concentration. Two bead tubes containing glass beads and lysis buffer were included as  
 43 extraction negative controls. The negative controls for concentration and extraction were  
 44 included in all ddPCR quantification plates containing the wastewater samples that were  
 45 processed together with the controls. In addition, each ddPCR quantification plate included at  
 46 least four no-template controls (NTCs) with RNase-free water and two positive controls using  
 47 gBlock Gene Fragments (IDT, USA; sequence provided in Tables S1-S3).

48 All valid quantification wells required the number of total generated droplets to be  
 49 greater than 10,000 droplets. For each target, the LOD was determined for each quantification  
 50 plate. The LOD was determined as three positive droplets plus the maximum number of positive  
 51 droplets among the negative controls. The LOD was then converted to copies per  $\mu\text{L}$  of DNA  
 52 template and copies per liter of wastewater based on the estimated droplet volume (0.86 nL), the  
 53 averaged number of total droplets throughout the plate, the volume fraction of DNA template

54 within a droplet (10/22), and the concentration factor during sample processing (Eq S1-3). The  
 55 LOD is calculated as 1,320 copies/L-wastewater assuming no positive droplets in the negative  
 56 controls and 19,000 total droplets as the average number of total droplets in each well.

57 Eq S1:

$$58 \text{ } LOD_{\text{droplet}} = 3 + \text{maximum number of positive droplets across all process blanks}^*$$

59 \*Process blanks include: two concentration blanks, two extraction blanks, and no less than four no  
 60 template controls per plate included in ddPCR quantification.

61 Eq S2:

$$62 \begin{aligned} & LOD_{\mu\text{L} - \text{RNA template}} \\ &= \frac{LOD_{\text{droplet}}}{0.86 \frac{nl}{\text{droplet}} \times n \text{ total droplets}^* \times \frac{10}{22} \text{ fraction of template within droplet}} = \frac{LOD_{\text{droplet}}}{1} \end{aligned}$$

63 \*Use the average total droplets across all samples in the ddPCR plate

64 Eq S3:

$$65 \begin{aligned} & LOD_{\text{L} - \text{wastewater}} \\ &= LOD_{\mu\text{L} - \text{DNA template}} \times 50 \mu\text{L total extraction} \times \frac{1000 \mu\text{L of lysis buffer with wa}}{300 \mu\text{L of lysis buffer}} \\ &\times \frac{1}{50 \text{ mL wastewater concentrated}} \times \frac{1000 \text{ mL}}{1 \text{ L}} \\ &= LOD_{\mu\text{L} - \text{DNA template}} \times \frac{1000000}{300} \text{ copies per L of wastewater} \end{aligned}$$

66

67 **S4. Recovery rates of respiratory virus in wastewater using filtration-ddPCR workflow**

68 Eq S4:

$$\text{Recovery rate (\%)} = \frac{C_{pcr}}{\frac{C_{stock} \times V_{stock}}{50 \text{ mL}} \times \frac{1000 \text{ mL}}{1 \text{ L}}} \times 100\%$$

69

70 Where:

71  $C_{pcr}$ : viral concentration from ddPCR, copies/L

72  $C_{stock}$ : viral concentration of virus stock, copies/ $\mu\text{L}$

73  $V_{stock}$ : volume of virus stock spiked into 50 mL of wastewater sample,  $\mu\text{L}$

74

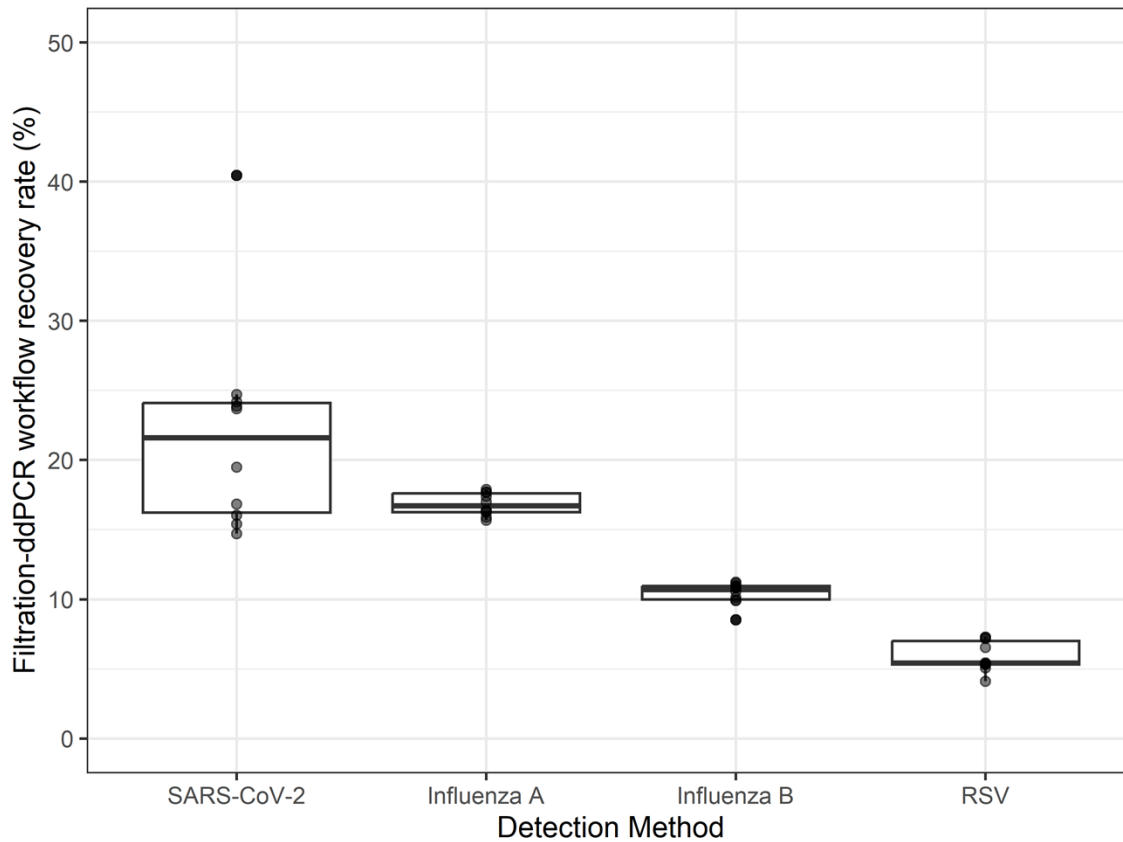

75

76 **Figure S1.** Filtration-ddPCR workflow recovery rate of SARS-CoV-2, influenza A, influenza B,  
77 and RSV. The boxplots show the measured recovery rate of 10 replicates of wastewater samples  
78 spiked with target viruses. Dots indicate the calculated recovery rate of each measurement.

79

80

81 **S5. The amount of nucleic acid extracts used in filtration-ddPCR workflow for target viral**  
82 **concentration quantification.**

83 Eq S5

$$\begin{aligned} & 50 \text{ mL wastewater concentrated} \times \\ & \frac{300 \text{ } \mu\text{L of lysis buffer used for extraction}}{1000 \text{ } \mu\text{L of lysis buffer with wastewater fraction resuspended}} \times \\ & \frac{10 \text{ } \mu\text{L RNA template for quantification}}{50 \text{ } \mu\text{L total extraction}} = 3 \text{ mL wastewater} \end{aligned}$$

84

85

86

87 **References:**

- 88 Hughes, B., Duong, D., White, B.J., Wigginton, K.R., Chan, E.M.G., Wolfe, M.K., Boehm, A.B.,  
89 2022. Respiratory Syncytial Virus (RSV) RNA in Wastewater Settled Solids Reflects  
90 RSV Clinical Positivity Rates. *Environ. Sci. Technol. Lett.* 9, 173–178.  
91 <https://doi.org/10.1021/acs.estlett.1c00963>
- 92 Lou, E.G., Sapoval, N., McCall, C., Bauhs, L., Carlson-Stadler, R., Kalvapalle, P., Lai, Y.,  
93 Palmer, K., Penn, R., Rich, W., Wolken, M., Brown, P., Ensor, K.B., Hopkins, L.,  
94 Treangen, T.J., Stadler, L.B., 2022. Direct comparison of RT-ddPCR and targeted  
95 amplicon sequencing for SARS-CoV-2 mutation monitoring in wastewater. *Sci. Total*  
96 *Environ.* 833, 155059. <https://doi.org/10.1016/j.scitotenv.2022.155059>
- 97 Lu, X., Wang, L., Sakthivel, S.K., Whitaker, B., Murray, J., Kamili, S., Lynch, B., Malapati, L.,  
98 Burke, S.A., Harcourt, J., Tamin, A., Thornburg, N.J., Villanueva, J.M., Lindstrom, S.,  
99 2022. US CDC Real-Time Reverse Transcription PCR Panel for Detection of Severe  
100 Acute Respiratory Syndrome Coronavirus 2. *Emerg. Infect. Dis.* J. 26.  
101 <https://doi.org/10.3201/eid2608.201246>
- 102 van Elden, L.J.R., Nijhuis, M., Schipper, P., Schuurman, R., van Loon, A.M., 2001.  
103 Simultaneous Detection of Influenza Viruses A and B Using Real-Time Quantitative  
104 PCR. *J. Clin. Microbiol.* 39, 196–200. <https://doi.org/10.1128/JCM.39.1.196-200.2001>
- 105 Whiley, D.M., Sloots, T.P., 2005. A 5'-nuclease real-time reverse transcriptase–polymerase  
106 chain reaction assay for the detection of a broad range of influenza A subtypes, including  
107 H5N1. *Diagn. Microbiol. Infect. Dis.* 53, 335–337.  
108 <https://doi.org/10.1016/j.diagmicrobio.2005.08.002>  
109
